# Supplementary material for: Pre-activation of autophagy impacts response to olaparib in prostate cancer cells
Source: PubMed Central journal article supplement (PMC8940895; doi:10.1038/s42003-022-03210-5), 2022-03-22
Supplement: 42003_2022_3210_MOESM3_ESM.pdf [file 42003_2022_3210_MOESM3_ESM.pdf]

## Description of Additional Supplementary Files

**File name:** Supplementary Data 1

**Description:** Source data presented in the figures.
